# Supplementary material
Source: PubMed Central journal article supplement (PMC2708823)

## Supplemental Figure 5

**Subcellular Localization of Overexpressed proteins**

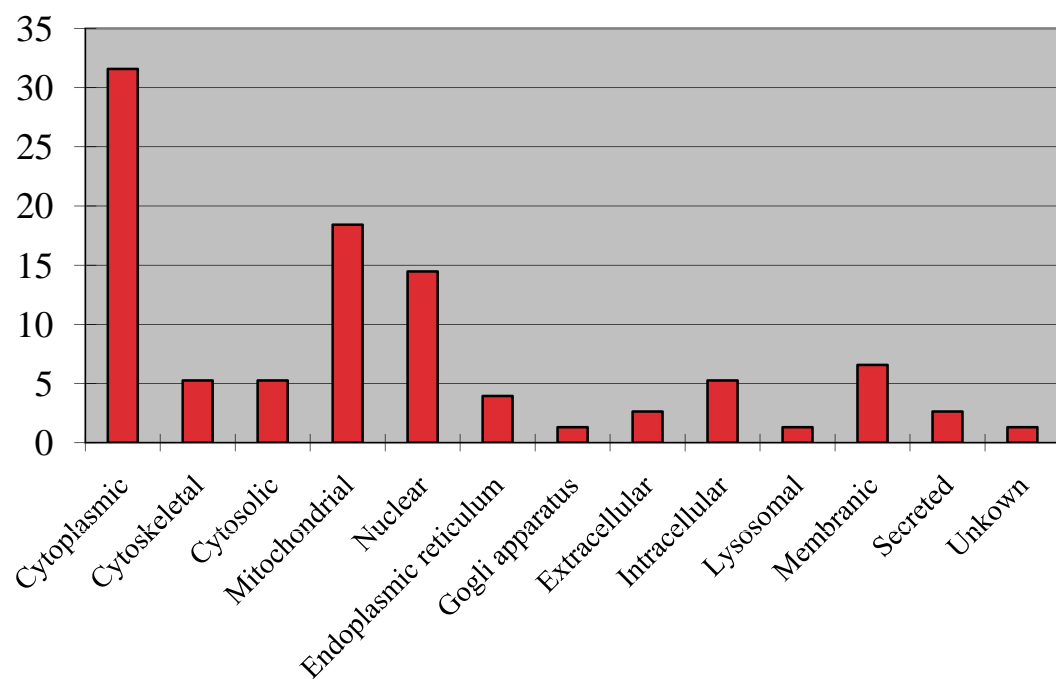

**Subcellular Localization of Suppressed proteins**

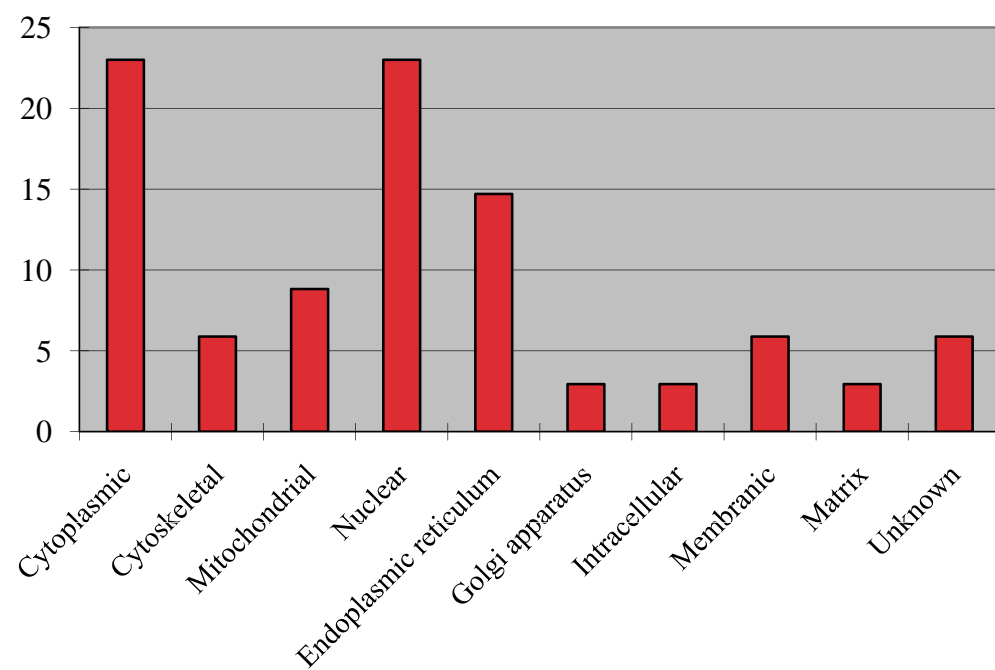

Supplement: ajpath.2009.081160_5.pdf [file ajpath.2009.081160_5.pdf]
