# Supplementary material
Source: PubMed Central journal article supplement (PMC2708823)

# Supplemental Figure 6

## Molecular Function of Overexpressed proteins

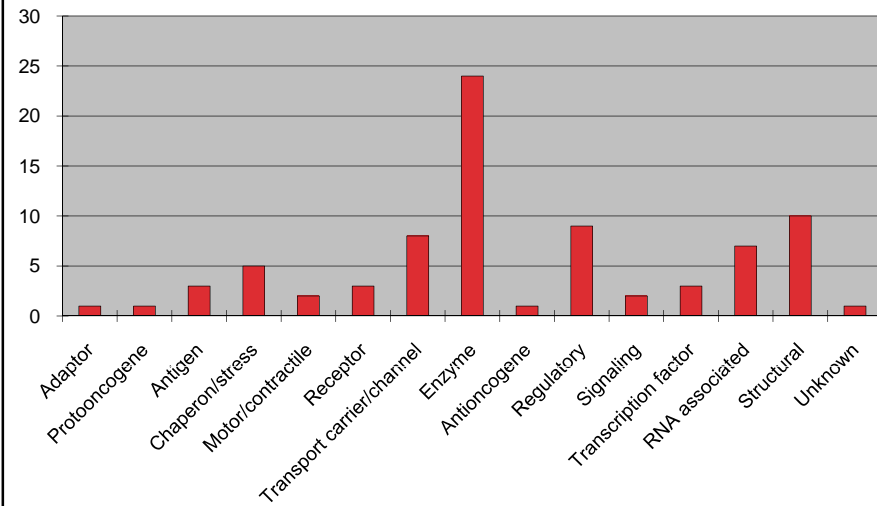

## Molecular Function of Suppressed proteins

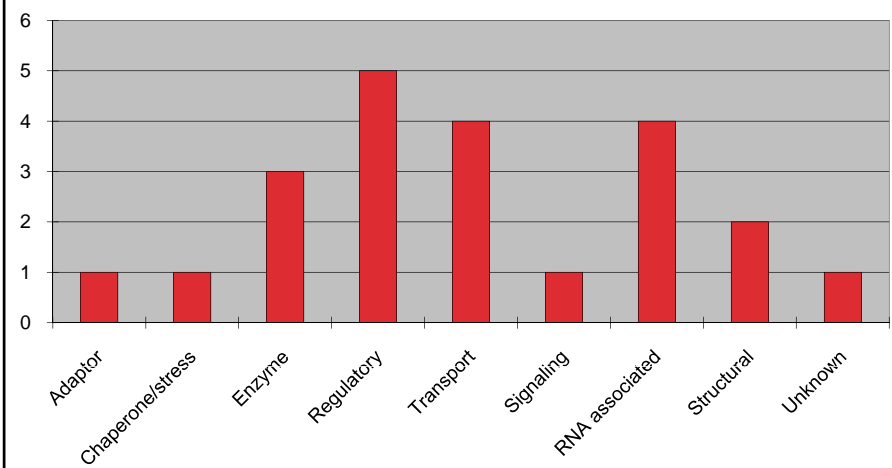

Supplement: ajpath.2009.081160_6.pdf [file ajpath.2009.081160_6.pdf]
