# Supplementary material
Source: PubMed Central journal article supplement (PMC2708823)

# Supplemental Figure 1

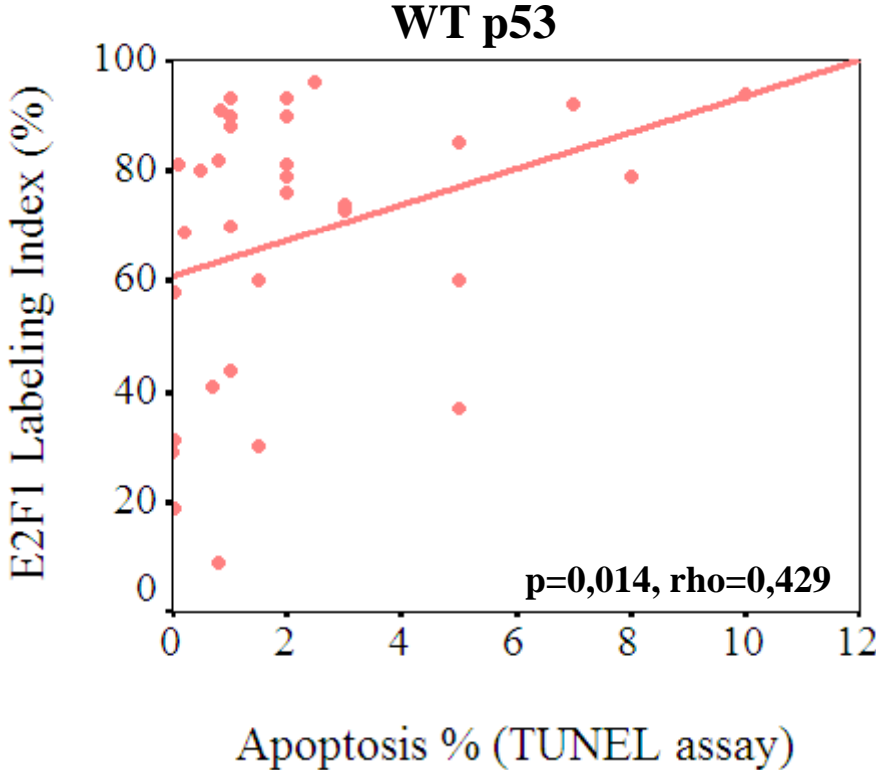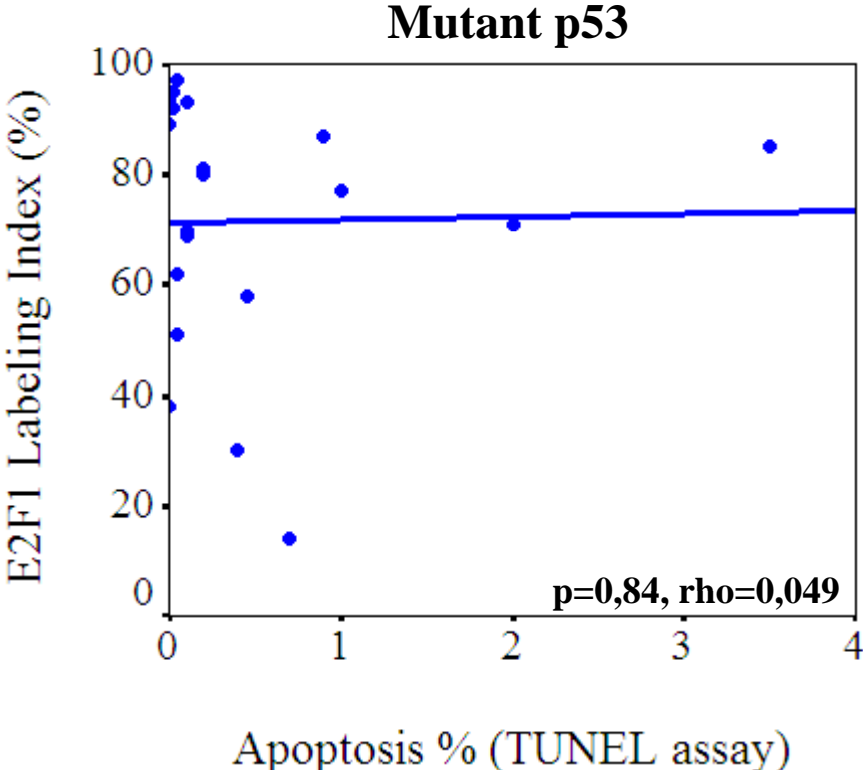

Supplement: ajpath.2009.081160_1.pdf [file ajpath.2009.081160_1.pdf]

## Supplemental Figure 2

**a.**

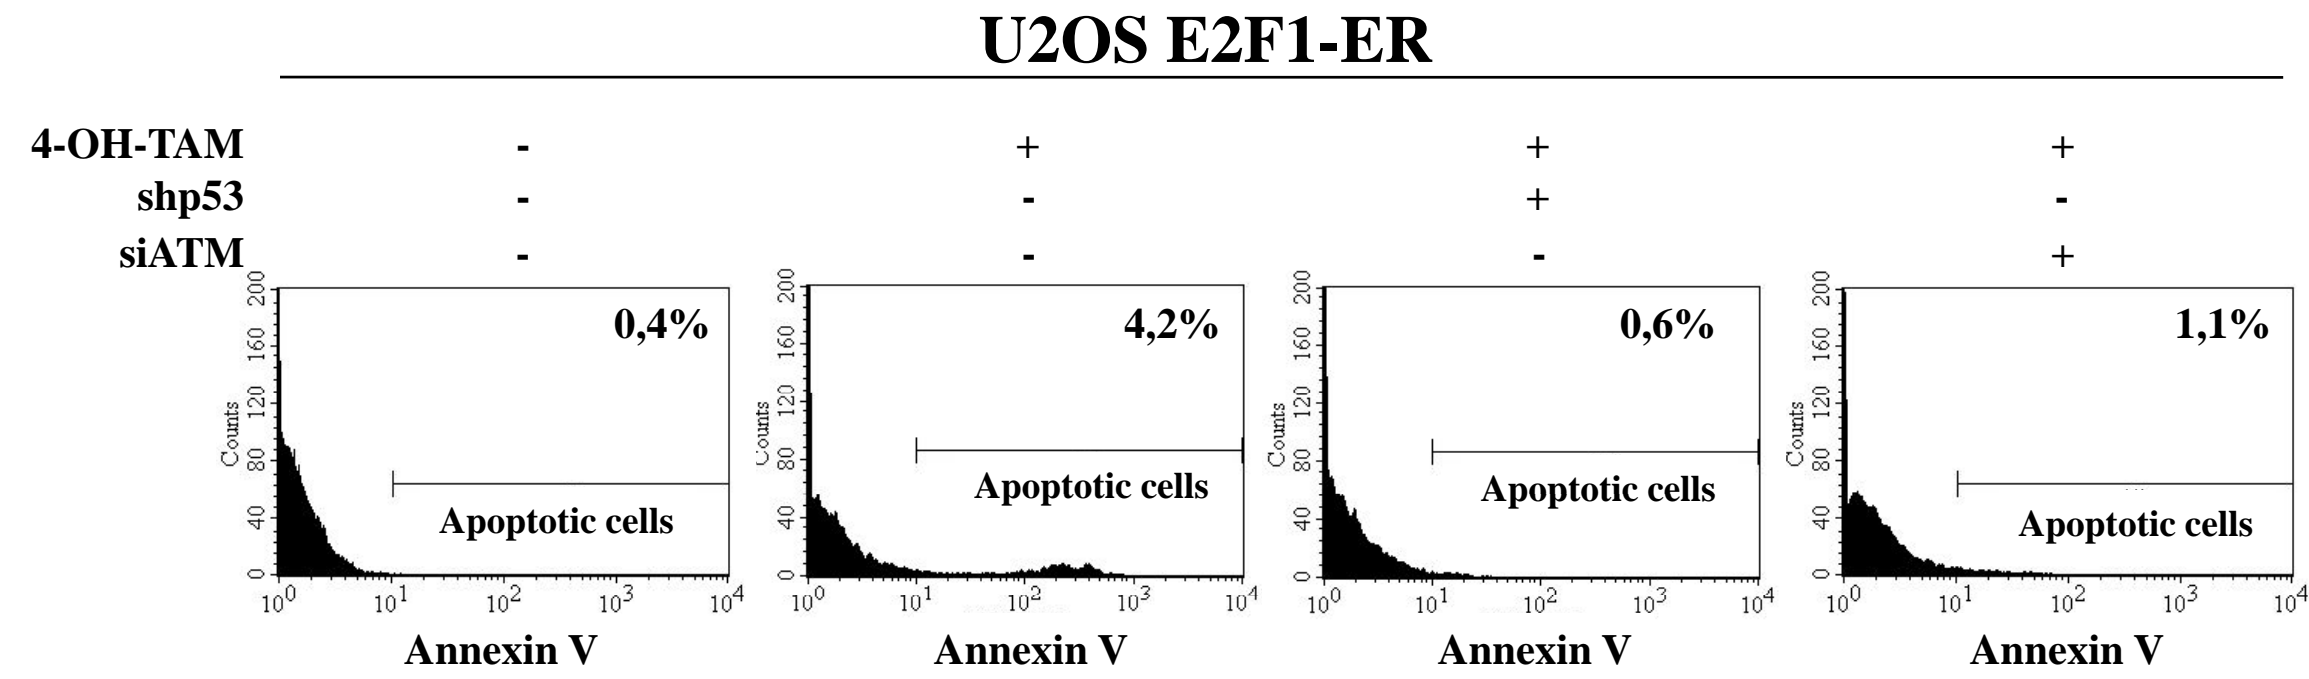

**b.**

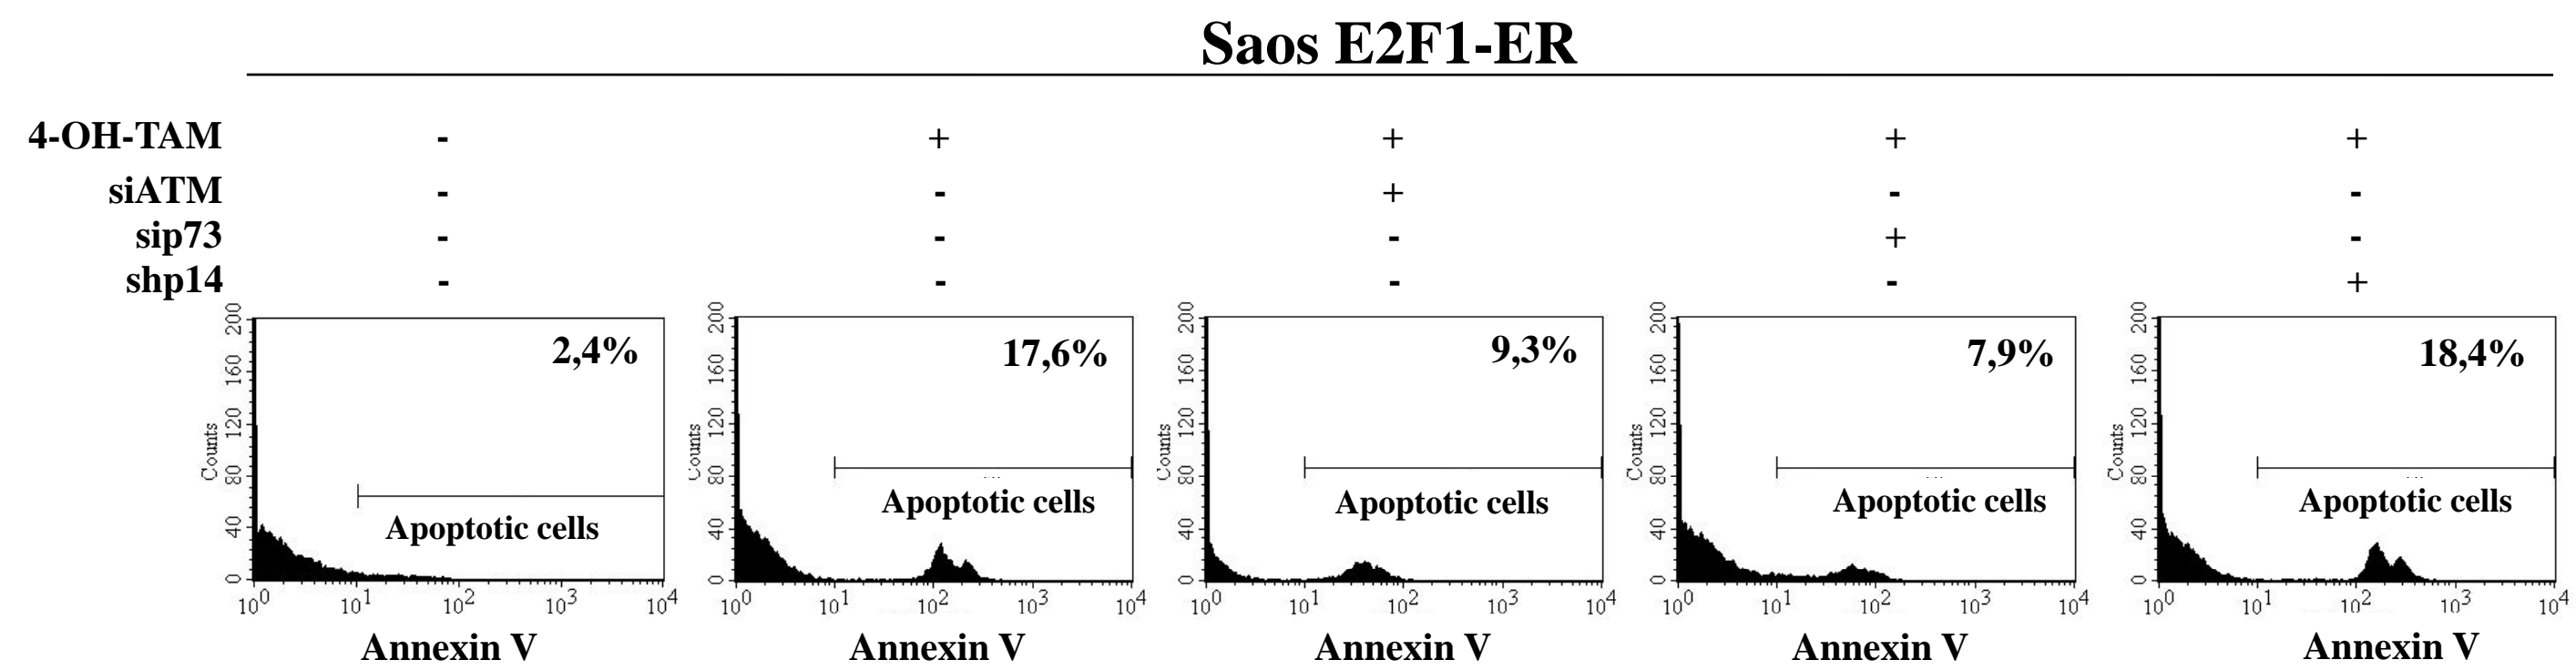

Supplement: ajpath.2009.081160_2.pdf [file ajpath.2009.081160_2.pdf]

# Supplemental Figure 3

**U2OS E2F1-ER non induced**

**U2OS E2F1-ER induced**

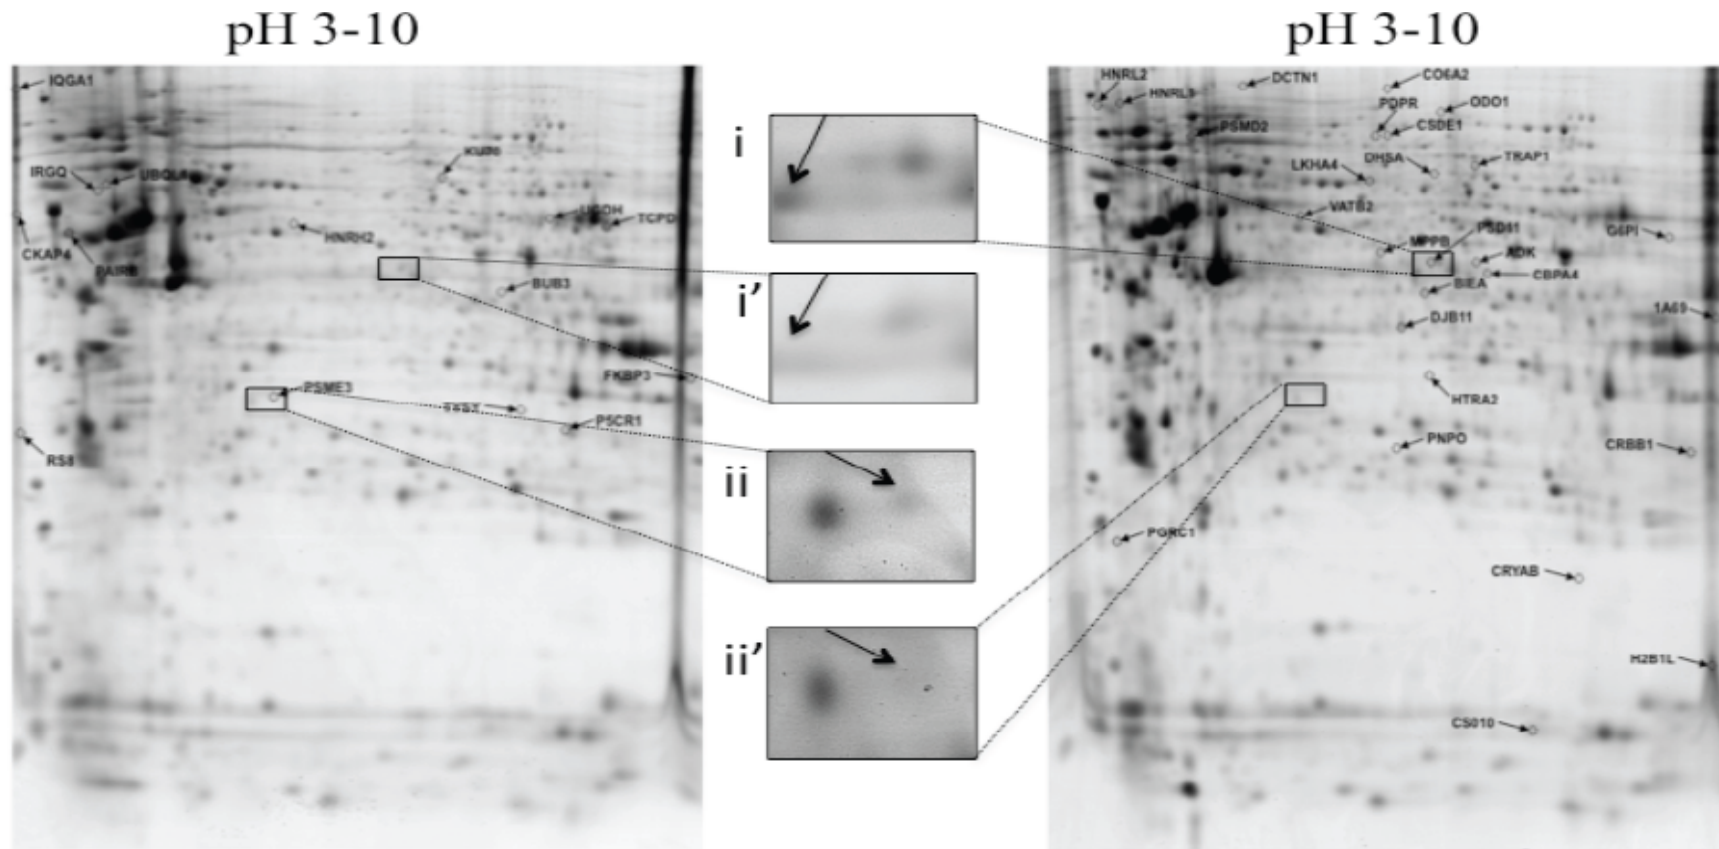

Supplement: ajpath.2009.081160_3.pdf [file ajpath.2009.081160_3.pdf]

# Supplemental Figure 4

## U2OS

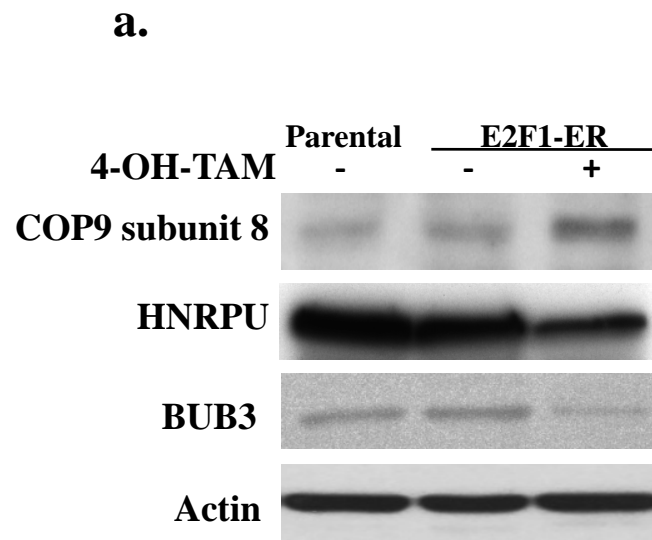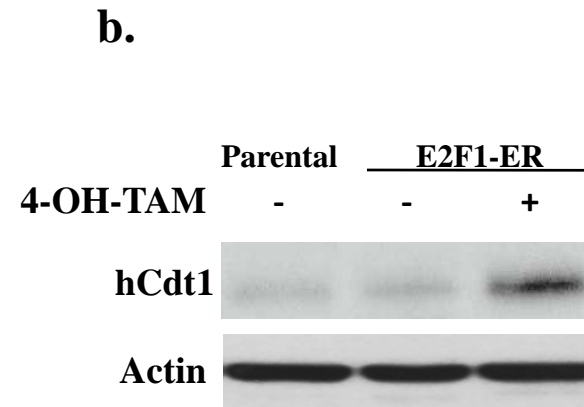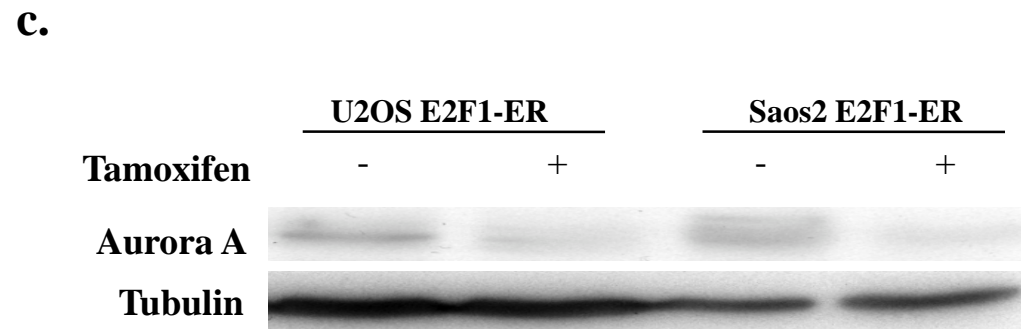

Supplement: ajpath.2009.081160_4.pdf [file ajpath.2009.081160_4.pdf]

Supplemental Figure 7a

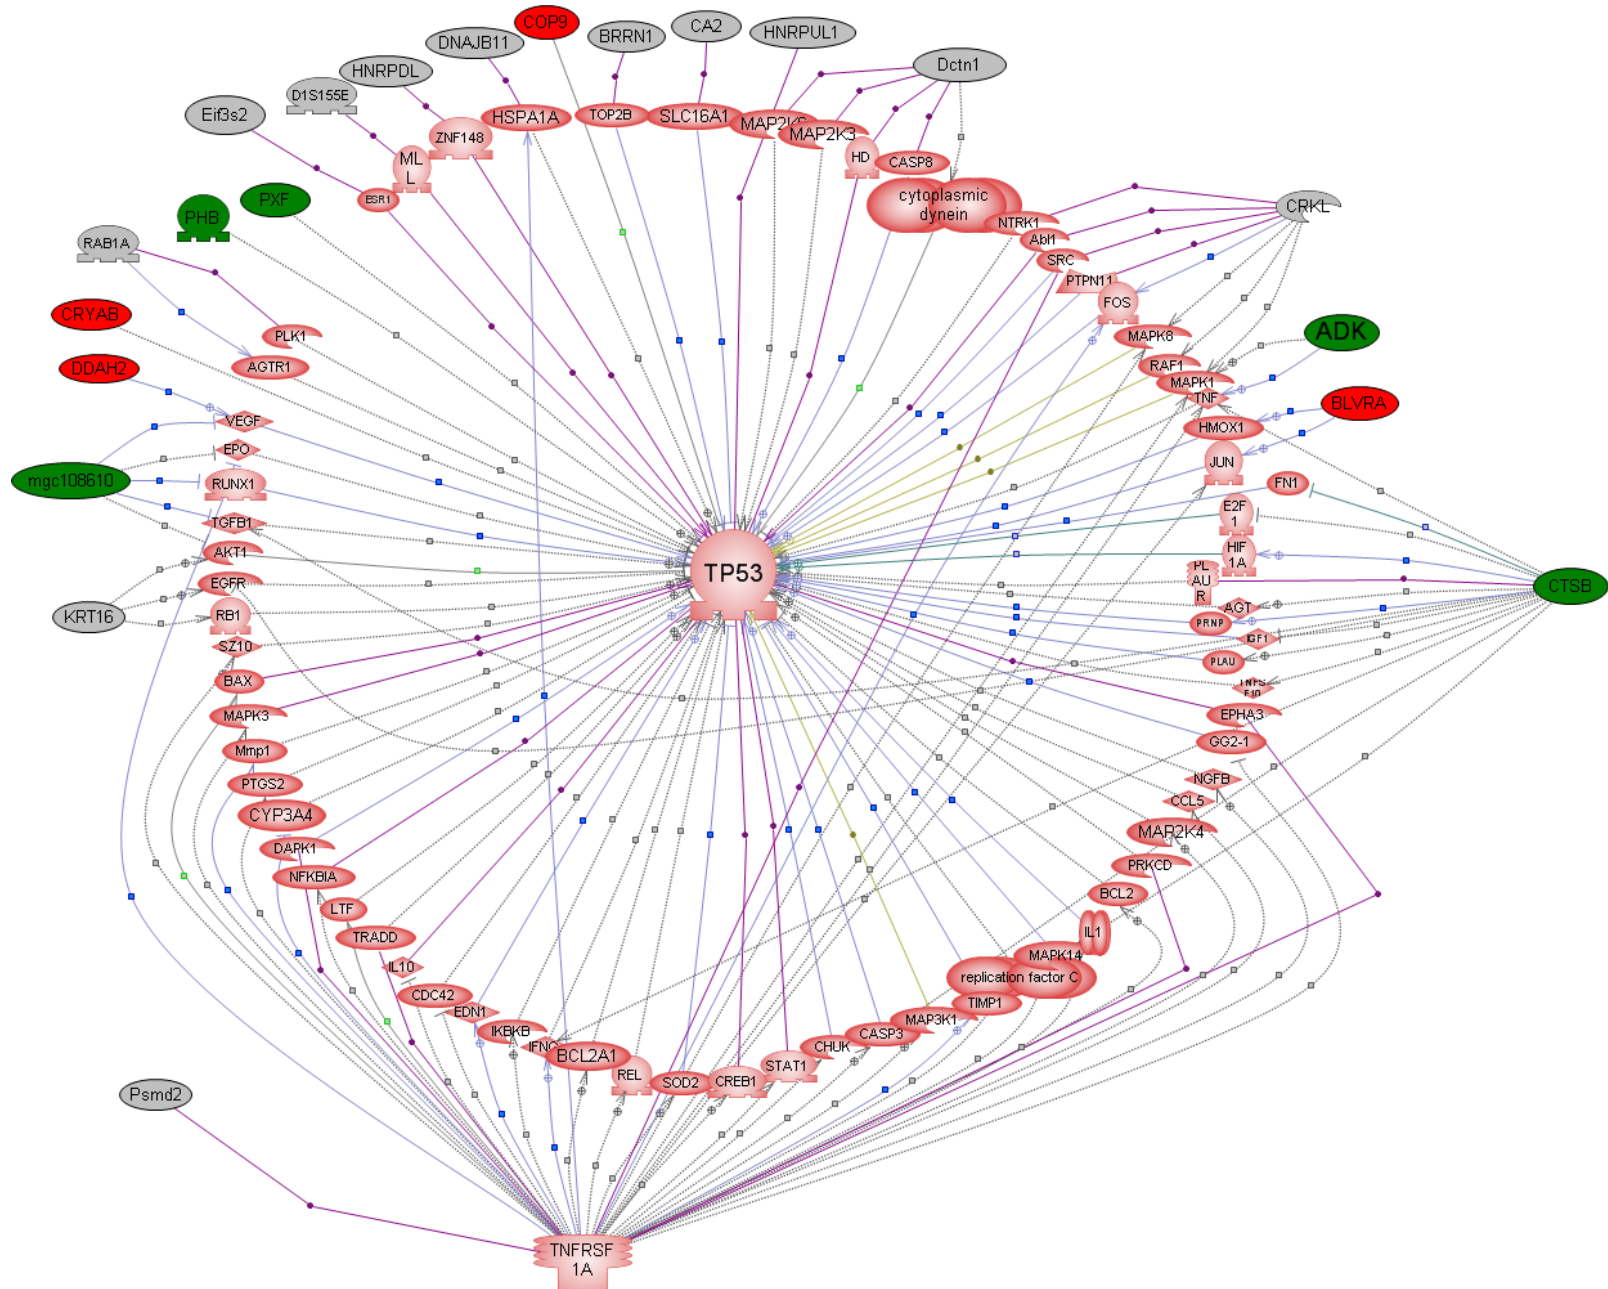

Supplemental Figure 7b

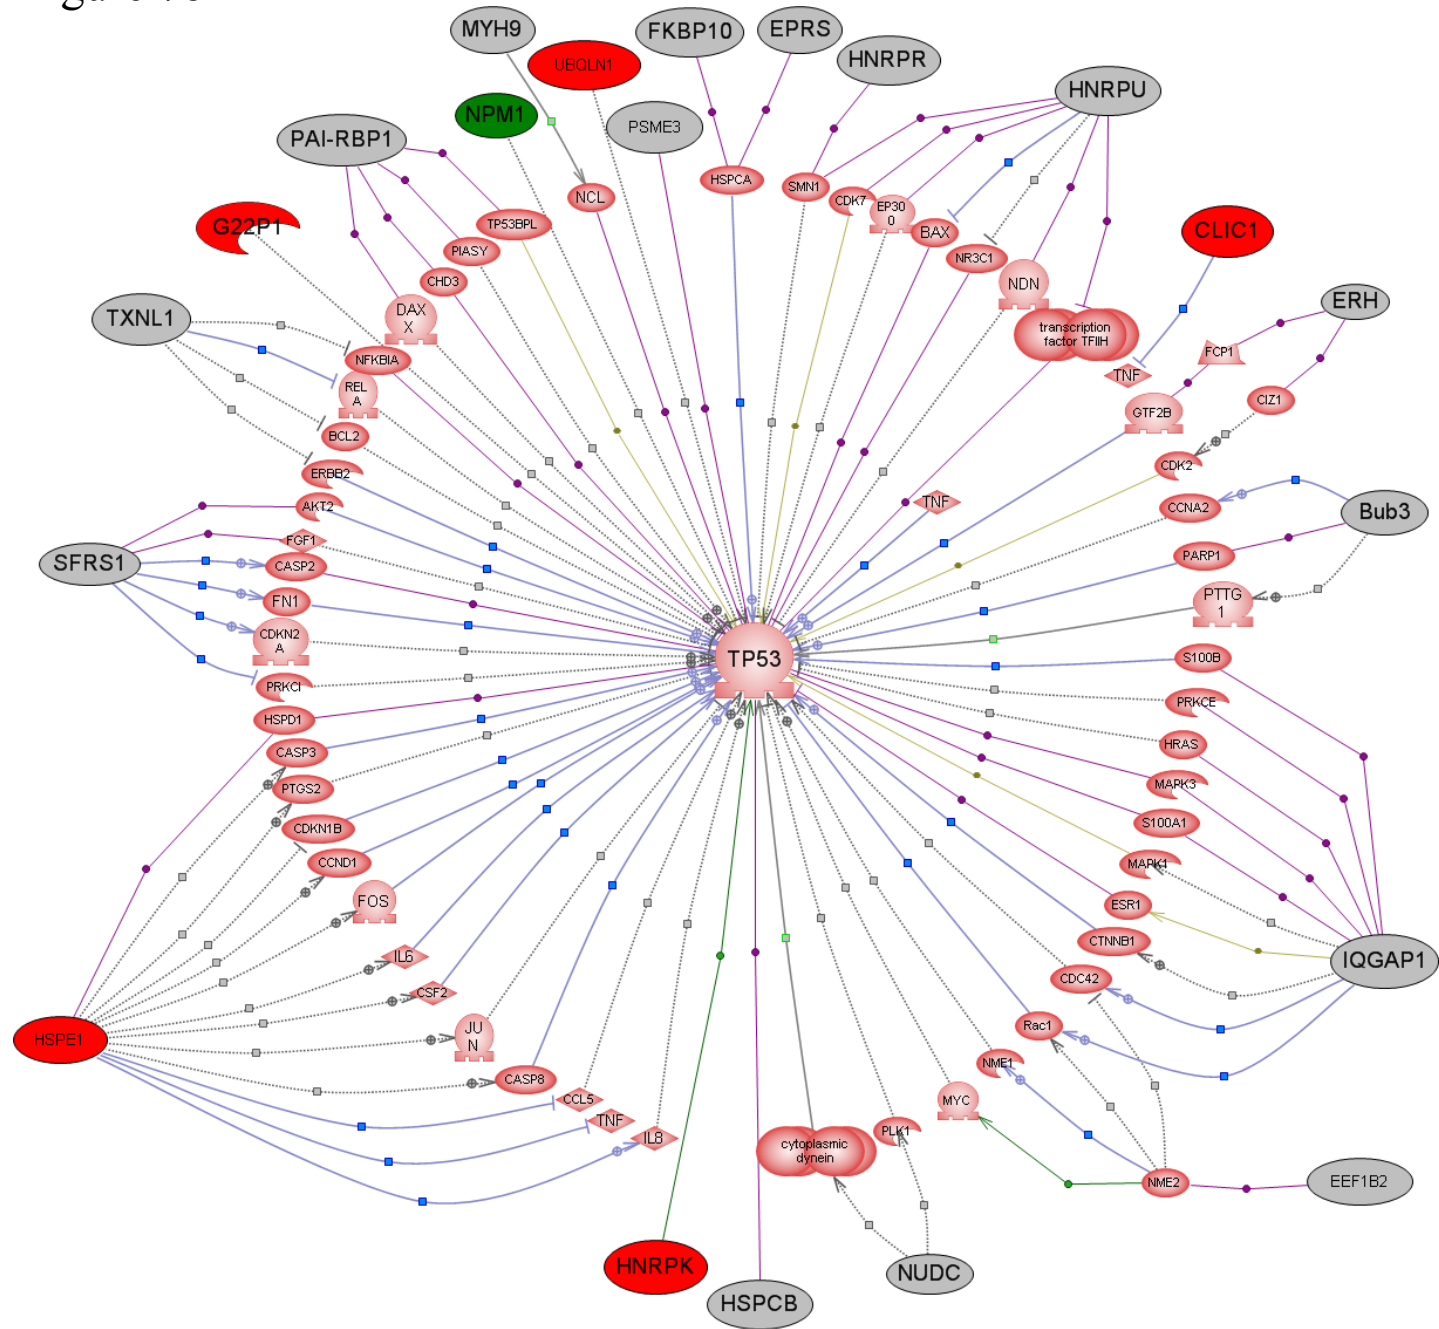

Supplement: ajpath.2009.081160_7.pdf [file ajpath.2009.081160_7.pdf]

Supplemental Figure 8b

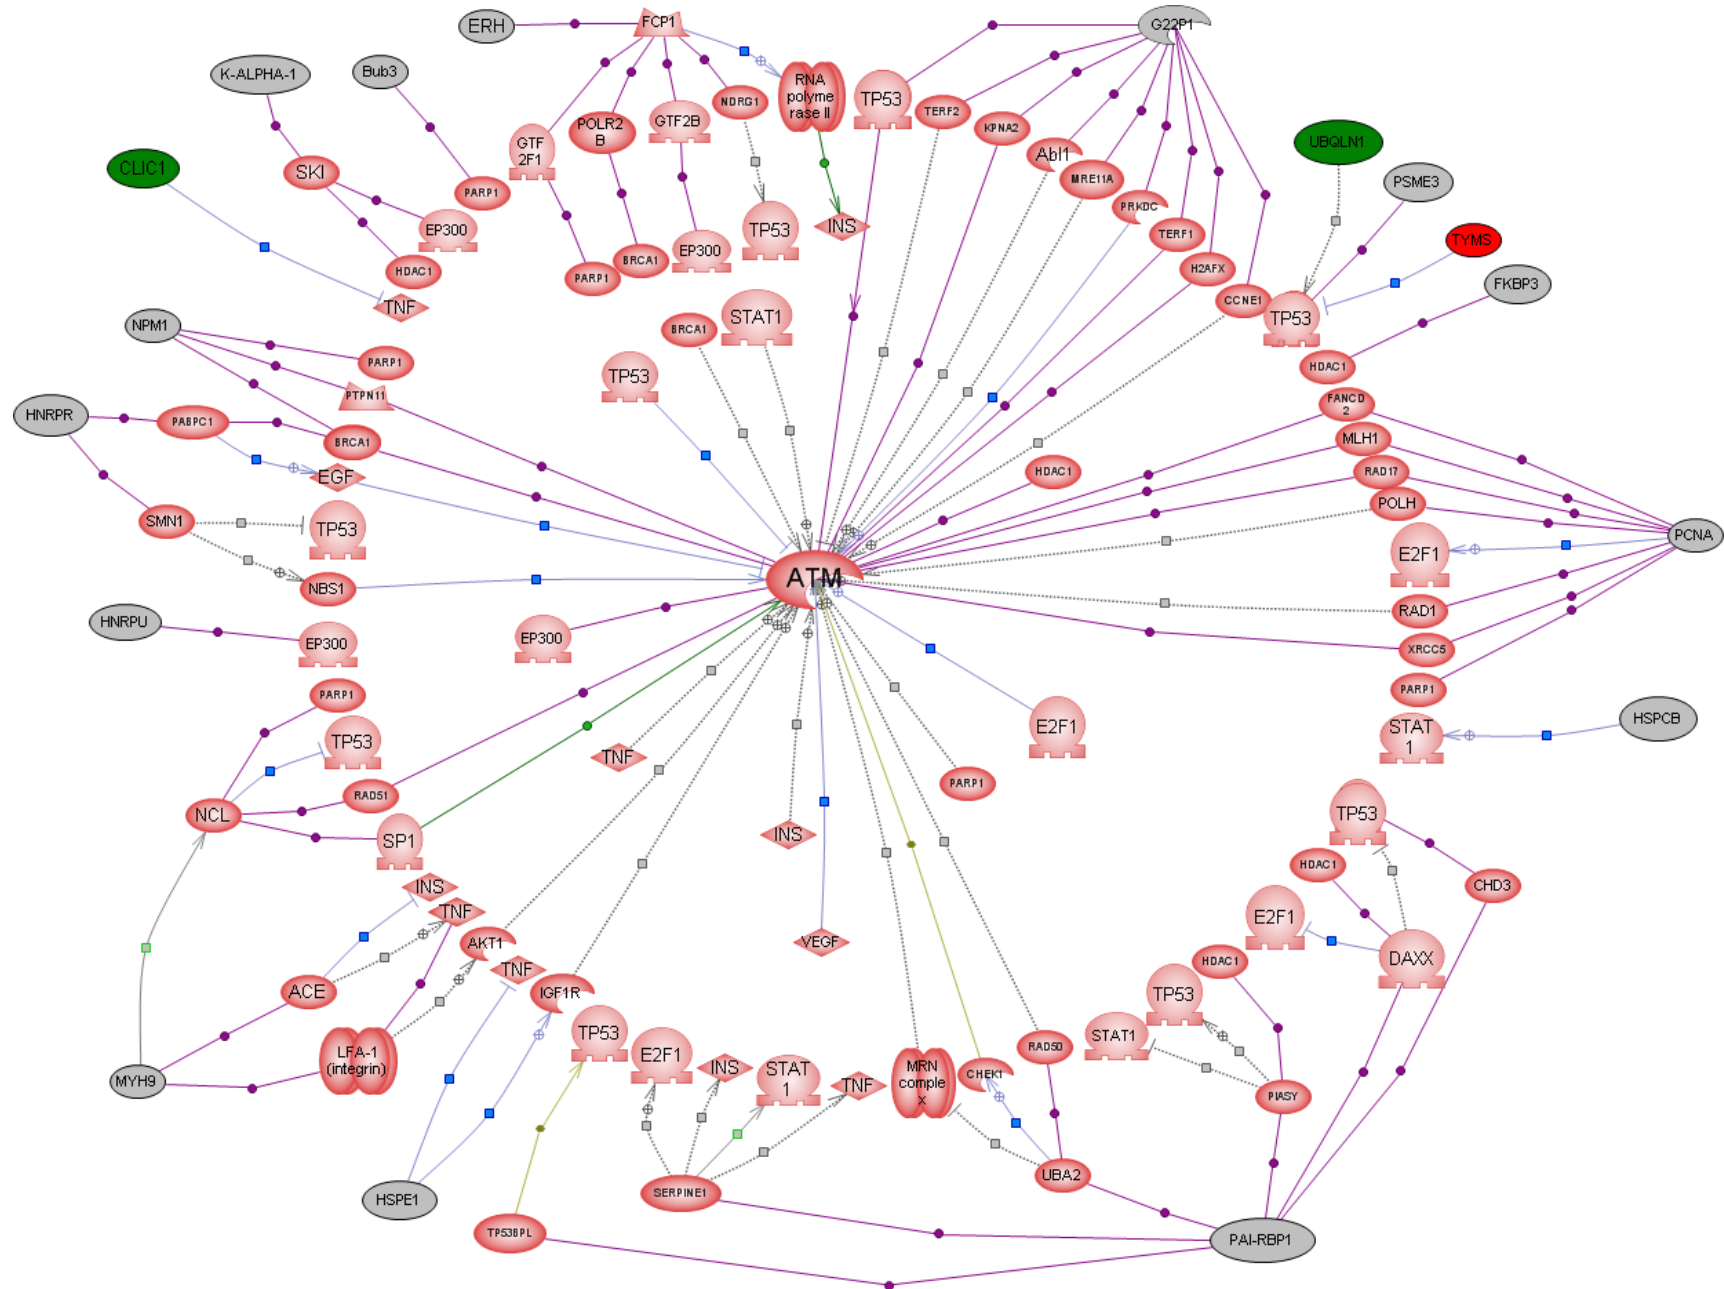

Supplement: ajpath.2009.081160_8.pdf [file ajpath.2009.081160_8.pdf]
